# Supplementary material for: Novel, non-invasive markers for detecting therapy induced neuroendocrine differentiation in castration-resistant prostate cancer patients
Source: PubMed Central journal article supplement (PMC8050049; doi:10.1038/s41598-021-87441-2), 2021-04-15

**Novel, non-invasive markers for detecting therapy induced neuroendocrine differentiation in castration-resistant prostate cancer patients**

Divya Bhagirath<sup>1</sup>, Michael Liston<sup>2</sup>, Theresa Akoto<sup>3</sup>, Byron Lui<sup>2</sup>, Barbara A. Bensing<sup>2</sup>, Ashok Sharma<sup>4</sup> and Sharanjot Saini<sup>1</sup>

<sup>1</sup>Department of Biochemistry and Molecular Biology, Augusta University

<sup>2</sup>Veterans Affairs Medical Center, San Francisco

<sup>3</sup>Department of Cellular Biology and Anatomy, Augusta University

<sup>4</sup>Department of Population Health Sciences, Augusta University

## SUPPLEMENTARY METHODS

### Classifier Methods<sup>1</sup>

Tools used: Python – Scikit-learn, Numpy, Pandas, BorutaPy

Outline:

#### I. Data Intro

- a. Features:
  - i. *Phase 0*: Original Data set
  - ii. *Phase 1*: Filtered Data set – (filtering was done based on **(1)** p-value column (0.05), **(2)** status column (Low, OK, Outlier), and **(3)** miRNA vs. ISO-miRNA.
  - iii. *Phase 2*: ISO-miR features filtered out.
- b. Observations:
  - i. 27 total observations; 21 = Control, 6 = Test
  - ii. Labels were generated based on Control, Test categorization (Control = FALSE, Test = TRUE).

#### II. Data Cleaning

- a. Filtering (as detailed in section ii of Data Intro, Dimensions)
- b. Transpose dataframe
  - i. The data was initially presented with features as rows and observations as columns.

#### III. Feature Selection

- a. BorutaPy library
  - i. Feature selection wrapper built around Random Forest algorithm.
  - ii. Forest tree depth for BorutaPy feature selection = 6 (Suggested tree depth from documentation: 3 to 7)

#### IV. Classifier Setup/Cross Validation

- a. Run 1: Random Forest with LPOCV
  - i. Purpose:
    1. Evaluate Random Forest model performance in conjunction with LPOCV.
  - ii. LPOCV setup:
    1. Compute all possible pair combinations of positive/negative classes (21 negative and 6 positive =  $21 \times 6 = 126$  cross validation folds).
    2. Iterate through combinations one by one:

- a. Generate data subset (training/validation sets)
  - b. Feed training set into BorutaPy feature selection.
  - c. Based on features suggested by BorutaPy, subset training/validation sets again.
  - d. Train Random Forest model on new training set.
  - e. Run predict function on validation pair (output are prediction probabilities from Random Forest predict\_proba function).
  - f. REPEAT until all 126 leave pair out cross validation folds are complete.
- b. Evaluation
- i. Pooled AUC Calculation
    1. Using the probability outcomes from all 126 cross validation iterations, area under the curve was calculated using Scikit-Learn's roc\_auc\_score metric (based on trapezoidal rule).
  - ii. Average AUC Calculation
    1. Calculate area under the curve score for each validation pair.
    2. Average all 126 calculations.
  - iii. Feature Importance
    1. Ranking of each features' average importance across all 126 models trained.

## SUPPLEMENTAL FIGURE LEGENDS

### **Fig. S1 Principal Component Analyses for CRPC-Adeno and CRPC-NE based on piRNAs**

Unsupervised principal component analyses (PCA) based on differential expression of piRNAs, as performed in CRPC-Adeno cases (n=21) and CRPC-NE models (n=6 + NCI-H660 cell line).

### **Fig. S2 Characterization of EVs isolated from prostate cancer cell lines**

Representative NTA analyses for LNCaP-AR (left panel), LNCaP-AR EnzR (middle panel) and NCI-H660 (upper right panel) cell lines. Particle concentrations as determined by NTA analyses are listed.

## **SUPPLEMENTARY TABLE LEGENDS**

### **Table S1 Clinicopathologic characteristics of metastatic CRPC patients**

Table summarizing the age, race, Gleason score of primary tumor, final serum PSA, metastatic sites and prior therapies of CRPC-Adeno and CRPC-NE samples (treatment-induced NEPC) used in the study.

### **Table S2 MicroRNA expression in CRPC Adeno vs CRPC NE EVs**

Table showing significantly dysregulated miRNAs identified by sequencing of serum EVs isolated from CRPC-Adeno (n=21) and CRPC-NE clinical samples (n=6) and NCI-H660 cell line.

### **Table S3 MicroRNAs altered in PCa EVs and corresponding clinical tissues**

Table showing corresponding tissue expression of significantly dysregulated miRNAs identified by sequencing of EVs isolated from CRPC-Adeno vs CRPC-NE clinical samples.

### **Table S4 List of miRNAs altered in *de novo* NEPC**

Table showing significantly dysregulated miRNAs identified by sequencing of prostate adenocarcinomas vs *de novo* NEPC cases.

### **Table S5 List of proteins identified by mass spectrometric analyses of protein content of EVs from NEPC cellular models**

Following extensive characterization of EVs, proteins were isolated from LNCaP-AR, LNCaP-AR-EnzR and NCI-H660 cells followed by mass spectrometric analyses by Shot gun approach. List of proteins identified are represented.

### **Table S6 Bioinformatic analyses of mass spectrometry data**

Examination of protein content of EVs from LNCaP-AR, LNCaP-AR-Enz resistant and NCI-H660 cell lines by mass spectrometric analyses identified several differentially expressed proteins in

LNCaP-AR-ENZ resistant and NCI-H660 EVs as compared to LNCaP-AR EVs (Fig. 6 and Table S5). List of KEGG pathways<sup>2,3</sup> (sheet 1), cellular fractions (sheet 2) and molecular functions (sheet 3) of proteins isolated from EVs of NCI-H660 cells as compared to EVs from LNCaP-AR cells as shown by the Database for Annotation, Visualization and Integrated Discovery (DAVID) v 6.8 software<sup>4</sup>. *In silico* analyses of cellular processes impacted by identified altered EV proteins showed that focal adhesion, phagosome, ECM-receptor interactions, complement and coagulation cascades and glycolysis/gluconeogenesis are top processes impacted by altered protein in NCI-H660 EVs (sheet 1 of table S6 and Fig. 6A). Further, 35% of EV proteins found in NEPC exosomes were predicted to be membranous, 56% cytoplasmic, 55% cytosolic, 38% nuclear, 20% were found to associated with cell cell adherens junction, 16% with focal adhesion and 13% were cell surface proteins (sheet 2 of table S6 and Fig. 6B). *In silico* analyses of impacted biological processes showed that proteins involved in cell-cell adhesion, protein stabilization, protein folding, extracellular matrix organization and negative regulation of apoptotic process were highly represented (sheet 3 of Table S6 and Fig. 6C).

## SUPPLEMENTARY REFERENCES

- 1 Bhagirath, D. *et al.* MicroRNA determinants of neuroendocrine differentiation in metastatic castration-resistant prostate cancer. *Oncogene*, doi:10.1038/s41388-020-01493-8 (2020).
- 2 Kanehisa, M. Toward understanding the origin and evolution of cellular organisms. *Protein Sci* **28**, 1947-1951, doi:10.1002/pro.3715 (2019).
- 3 Kanehisa, M. & Goto, S. KEGG: kyoto encyclopedia of genes and genomes. *Nucleic Acids Res* **28**, 27-30, doi:10.1093/nar/28.1.27 (2000).
- 4 Huang da, W., Sherman, B. T. & Lempicki, R. A. Systematic and integrative analysis of large gene lists using DAVID bioinformatics resources. *Nat Protoc* **4**, 44-57, doi:10.1038/nprot.2008.211 (2009).

Fig. S1 Principal Component Analyses for CRPC-Adeno and CRPC-NE based on piRNA profile of corresponding EVs

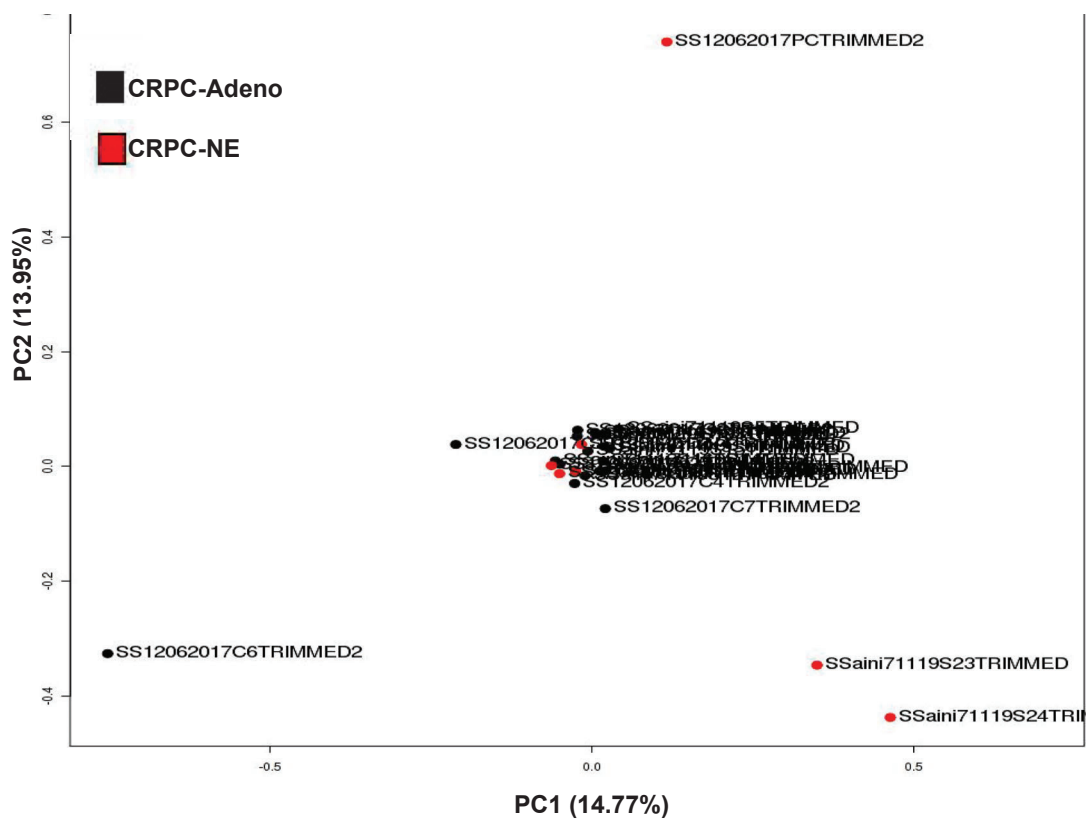

Fig. S2 Charcaterization of exosomes/EVs isolated from prostate cancer cell lines

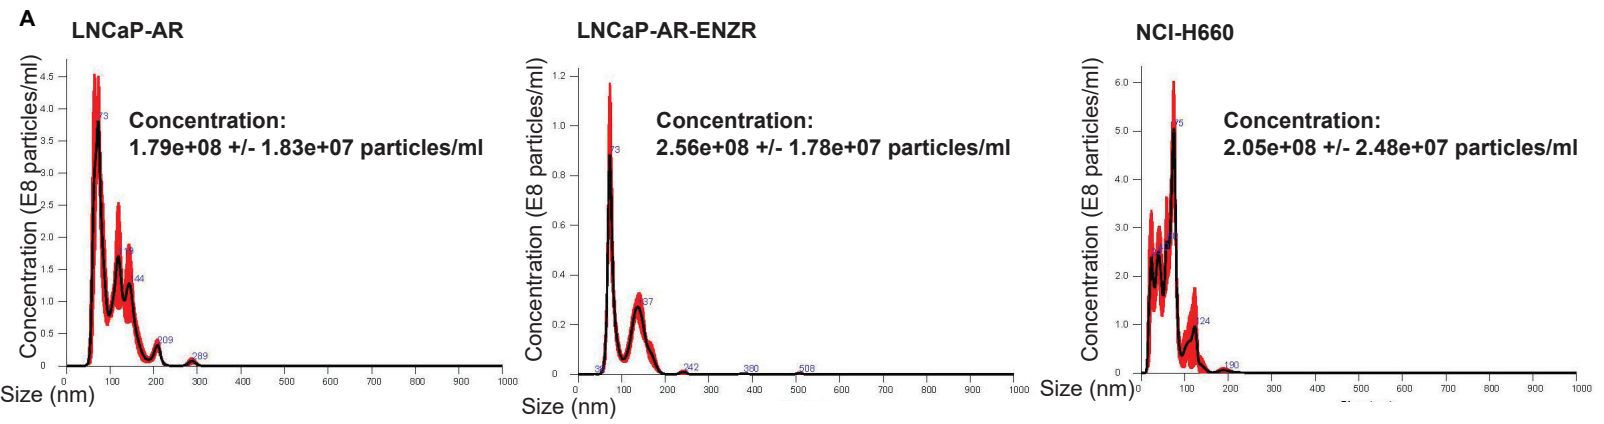

**Table S1. Clinicopathologic characteristics of prostate cancer patients**

| <b>Patient Characteristics</b>                                                                                                            | <b>CRPC (Adeno)</b>   | <b>CRPC (NE)</b> |
|-------------------------------------------------------------------------------------------------------------------------------------------|-----------------------|------------------|
| Number of patients                                                                                                                        | 22                    | 6                |
| Median age at diagnosis in years (range)                                                                                                  | 64 (45 - 80)          | 62 (57 - 64)     |
| Median age at death in years (range)                                                                                                      | 72 (90+ - 53)         | 67 (60 - 76)     |
| Median survival after diagnosis in years (range)                                                                                          | 7 (2 - 25)            | 4 (2 - 13)       |
| Median PSA at death in ng/mL (range)                                                                                                      | 328.85 (5.63 - 15000) | 1 (0.15 – 8.85)  |
| Race: Caucasians (C) Others including African American, Hispanics, Asians (O)                                                             | <b>C- 20 O- 2</b>     | <b>C- 5</b>      |
|                                                                                                                                           |                       |                  |
| <b>Gleason Score</b>                                                                                                                      |                       |                  |
| 4-6                                                                                                                                       | 3                     | -                |
| 7                                                                                                                                         | 8                     | 2                |
| 8-10                                                                                                                                      | 9                     | 3                |
| Unknown                                                                                                                                   | 2                     | -                |
|                                                                                                                                           |                       |                  |
| <b>Metastatic sites</b>                                                                                                                   |                       |                  |
| Lung                                                                                                                                      | 3                     | 1                |
| Liver                                                                                                                                     | 5                     | 1                |
| Lymph node (LN)                                                                                                                           | 7                     | -                |
| Others (Skin, Retroperitoneal, Periaortic LN, Retroperitoneal LN, Diaphragm, Retrosternal LN, Spleen, Omentum, Cortical, Pelvic LN, Mass) | 7                     | 3                |
|                                                                                                                                           |                       |                  |
| <b>Androgen Ablation Therapy</b>                                                                                                          |                       |                  |
| Number of patients receiving androgen ablation therapy (%)                                                                                | 22 (100)              | 5 (100)          |



|                                                                    |         |        |
|--------------------------------------------------------------------|---------|--------|
| Number of patients receiving Enzalutamide, Abiraterone or both (%) | 3 (14)  | 1 (20) |
|                                                                    |         |        |
| <b>Other Therapies</b>                                             |         |        |
| Ketoconazole (%)                                                   | 10 (45) | 1 (20) |
| DES (%)                                                            | 8 (36)  | 1 (20) |
| Corticosteroids (%)                                                | 15 (68) | 3 (60) |
| Estramustine (%)                                                   | 4 (18)  | 1 (20) |
| Taxotere (%)                                                       | 14 (64) | 3 (60) |



Western blots Fig. 5

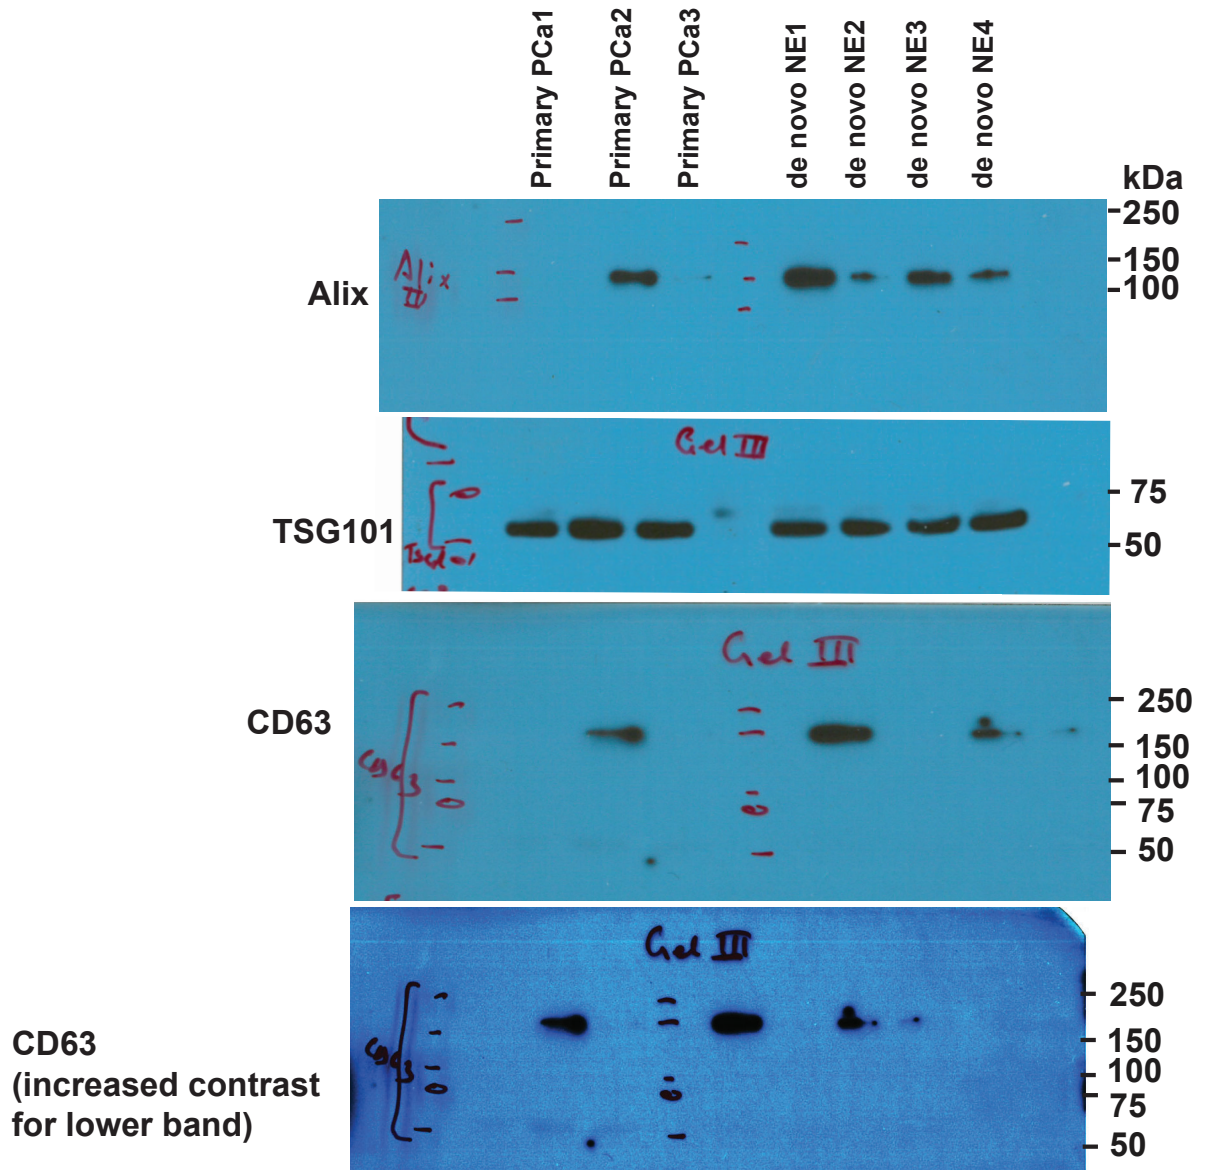

Western blots Figure 7

A

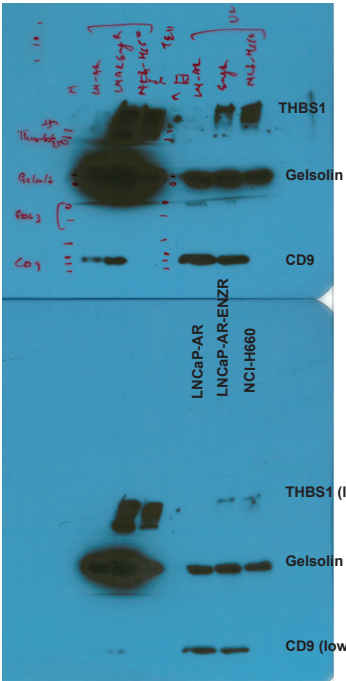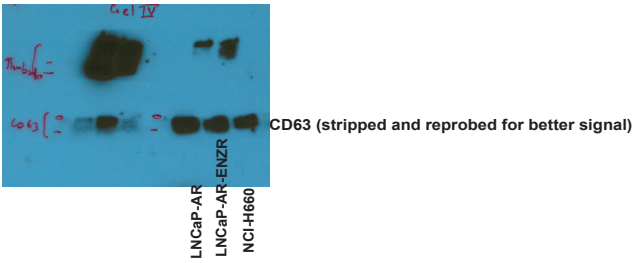

B

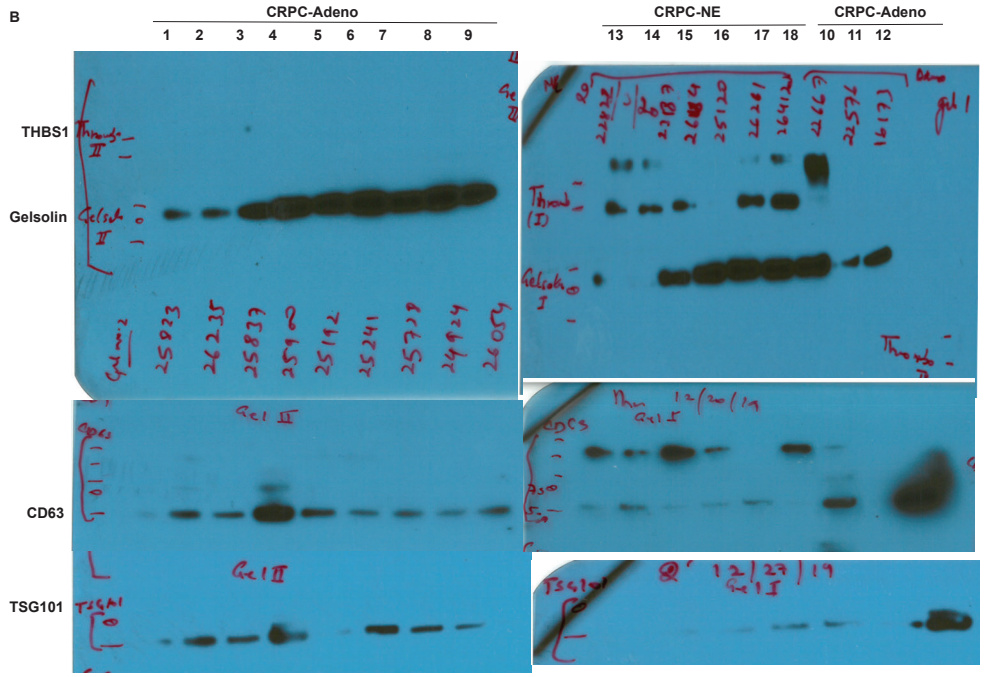

Supplement: 41598_2021_87441_MOESM1_ESM.pdf [file 41598_2021_87441_MOESM1_ESM.pdf]
